# Supplementary material for: Prediction of metastable zone widths of ammonium sulphate: modification of the nucleation potential model in an electrolyte system
Source: Royal Society of Chemistry journal article supplement (doi:10.1039/d2ce01018f), 2022-01-01
Supplement: d2ce01018f1.pdf [file d2ce01018f1.pdf]

## Supporting Information

### **Prediction of metastable zone widths of ammonium sulphate: Modification of the nucleation potential model in an electrolyte system**

Yunna Xue<sup>a</sup>, Yizhen Yan<sup>a</sup>, Zehao Si<sup>a</sup>, Qi Zhang<sup>a</sup>, Huaiyu Yang<sup>b, \*</sup>,  
Xiangyang Zhang<sup>a, \*</sup>, Xinggui Zhou<sup>a</sup>

<sup>a</sup> State Key Laboratory of Chemical Engineering, East China University of Science and Technology, Shanghai 200237, China

<sup>b</sup> Department of Chemical Engineering, Loughborough University, Loughborough, LE113TU, UK

### **List of table and figure captions**

Table S1. Detailed information reported in the literature on the increase in the MSZWs with increasing saturation temperature.

Table S2. Detailed information reported in the literature on the decrease in the MSZWs with increasing saturation temperature.

Table S3. Viscosity of ammonium sulphate solutions at different concentrations adapted from Mullin et al.<sup>1</sup> (Fig. 3)

Table S1. Detailed information reported in the literature on the increase in the MSZWs with increasing saturation temperature.

| No. | Reference                              | Year | Solute                | Solvents                       |
|-----|----------------------------------------|------|-----------------------|--------------------------------|
| 1   | Medina-Galván et al. <sup>2</sup>      | 2022 | acetylsalicylic acid  | ethanol                        |
| 2   | Xu et al. <sup>3</sup>                 | 2021 | benzoic acid          | chloroform                     |
| 3   | Su et al. <sup>4</sup>                 | 2018 | sodium sulfate        | water                          |
| 4   | Nemdili et al. <sup>5</sup>            | 2016 | citric acid anhydrate | water                          |
| 5   | Zhang et al. <sup>6</sup>              | 2015 | lovastatin            | methanol, ethanol, and acetone |
| 6   | Mealey et al. <sup>7</sup>             | 2015 | salicylic acid        | ethyl acetate                  |
| 7   | Mielniczek-Brzóska et al. <sup>8</sup> | 2014 | potassium nitrate     | water                          |
| 8   | Zhang et al. <sup>9</sup>              | 2012 | DL-tartaric acid      | water                          |
| 9   | Gharsallaoui et al. <sup>10</sup>      | 2008 | maltitol              | water                          |

Table S2. Detailed information reported in the literature on the decrease in the MSZWs with increasing saturation temperature.

| No. | Reference                     | Year | Solute                            | Solvents                                                     |
|-----|-------------------------------|------|-----------------------------------|--------------------------------------------------------------|
| 1   | Wang et al. <sup>11</sup>     | 2022 | adipic acid                       | water, methanol, and n-butanol                               |
| 2   | Wang et al. <sup>12</sup>     | 2022 | p-methoxybenzoic acid             | ethanol-water                                                |
| 3   | Mohod et al. <sup>13</sup>    | 2022 | copper (II) sulphate pentahydrate | water                                                        |
| 4   | Maharana et al. <sup>14</sup> | 2022 | pyrazinamide                      | acetone                                                      |
| 5   | Gu et al. <sup>15</sup>       | 2022 | metformin hydrochloride           | Water, methanol, ethanol, and n-propanol                     |
| 6   | Cao et al. <sup>16</sup>      | 2022 | isosorbide 5-mononitrate          | n-propanol, n-butanol, n-propyl acetate, and n-butyl acetate |
| 7   | Zhao et al. <sup>17</sup>     | 2021 | nicotinic acid                    | ethanol                                                      |
| 8   | Shiau <sup>18</sup>           | 2021 | L-glycine                         | water                                                        |
| 9   | Yang et al. <sup>19</sup>     | 2020 | ethyl vanillin                    | ethanol, n-propanol, and n-butanol                           |
| 10  | Zhang et al. <sup>20</sup>    | 2019 | urea phosphate                    | water                                                        |
| 11  | Huang et al. <sup>21</sup>    | 2019 | glutaric acid                     | acetic acid                                                  |
| 12  | Bian et al. <sup>22</sup>     | 2019 | sodium nitrate                    | water (with additives)                                       |
| 13  | Xiong et al. <sup>23</sup>    | 2018 | aspirin                           | acetic acid-acetic anhydride                                 |

|    |                                        |      |                                               |                                             |
|----|----------------------------------------|------|-----------------------------------------------|---------------------------------------------|
| 14 | Shiau <sup>24</sup>                    | 2018 | glycine                                       | water                                       |
| 15 | Mastan et al. <sup>25</sup>            | 2017 | L-phenylalanine                               | water                                       |
| 16 | Luo et al. <sup>26</sup>               | 2017 | potassium sulfate                             | water                                       |
| 17 | Liu et al. <sup>27</sup>               | 2017 | glycine barium<br>bromo chloride              | water                                       |
| 18 | Xu et al. <sup>28</sup>                | 2016 | eszopiclone                                   | butyl acetate                               |
| 19 | Wang et al. <sup>29</sup>              | 2016 | gestodene                                     | ethanol                                     |
| 20 | Wang et al. <sup>30</sup>              | 2016 | sodium<br>dichromate<br>dihydrate             | water                                       |
| 21 | Ntuk et al. <sup>31</sup>              | 2016 | aluminium<br>hydroxyfluoride<br>hydrate       | water                                       |
| 22 | Yuan et al. <sup>32</sup>              | 2015 | DL-malic acid                                 | water                                       |
| 23 | You et al. <sup>33</sup>               | 2015 | ammonium<br>aluminum sulfate<br>dodecahydrate | water                                       |
| 24 | Yang <sup>34</sup>                     | 2015 | butyl paraben                                 | ethanol                                     |
| 25 | Sangwal et al. <sup>35</sup>           | 2014 | ammonium<br>oxalate                           | water-acetone                               |
| 26 | Qian et al. <sup>36</sup>              | 2014 | SrCl <sub>2</sub> ·6H <sub>2</sub> O          | water                                       |
| 27 | Zhang et al. <sup>37</sup>             | 2011 | triethanolamine<br>hydrochloride              | water, ethanol-<br>water, and HCl-<br>water |
| 28 | Pattanaboonmee<br>et al. <sup>38</sup> | 2011 | ammonium<br>dihydrogen<br>orthophosphate      | water                                       |
| 29 | Sangwal <sup>39</sup>                  | 2009 | potassium<br>tetraborate                      | water                                       |
| 30 | Sangwal <sup>40</sup>                  | 2009 | nitrotriazolinone                             | water                                       |
| 31 | Gao et al. <sup>41</sup>               | 2009 | glycine                                       | water                                       |
| 32 | Sahin et al. <sup>42</sup>             | 2007 | maltitol                                      | water                                       |

Table S3. Viscosity of ammonium sulphate solutions at different concentrations adapted from Mullin et al.<sup>1</sup> (Fig. 3)

| Concentration<br>(kg/kg water) | Temperature<br>(°C) | Viscosity<br>(10 <sup>3</sup> N sec/m <sup>2</sup> ) |
|--------------------------------|---------------------|------------------------------------------------------|
|                                | 20                  | 1.08                                                 |
| 0.2                            | 25                  | 1.23                                                 |
|                                | 30                  | 1.40                                                 |
|                                | 20                  | 1.42                                                 |
| 0.4                            | 25                  | 1.60                                                 |
|                                | 30                  | 1.79                                                 |

|     |    |      |
|-----|----|------|
|     | 20 | 1.86 |
| 0.6 | 25 | 2.08 |
|     | 30 | 2.32 |

## Reference

1. J. W. Mullin, M. Chakraborty and K. Mehta, *J. Appl. Chem.*, 1970, **20**, 367-371.
2. X. M. Medina-Galvan, P. A. Quintana-Hernandez, L. F. Fuentes-Cortes and G. M. Martinez-Gonzalez, *Chem. Eng. Technol.*, 2022, **45**, 1264-1270.
3. S. Xu, H. Zhang, B. Qiao and Y. Wang, *J. Mol. Liq.*, 2021, **343**.
4. N. Su, Y. Wang, Y. Xiao, H. Lu, Y. Lou, J. Huang, M. He, Y. Li and H. Hao, *Ind. Eng. Chem. Res.*, 2018, **57**, 1705-1713
5. L. Nemdili, O. Koutchoukali, M. Bouhelassa, J. Seidel, F. Mameri and J. Ulrich, *J. Cryst. Growth*, 2016, **451**, 88-94.
6. X. Zhang, Z. Yang, J. Chai, J. Xu, L. Zhang, G. Qian and X. Zhou, *Chem. Eng. Sci.*, 2015, **133**, 62-69.
7. D. Mealey, D. M. Croker and A. C. Rasmuson, *Crystengcomm*, 2015, **17**, 3961-3973.
8. E. Mielniczek-Brzóska, *J. Cryst. Growth*, 2014, **401**, 271-274.
9. X. Zhang, X. Wang, L. Hao, X. Yang, L. Dang and H. Wei, *Cryst. Res. Technol.*, 2012, **47**, 1153-1163.
10. A. Gharsallaoui, B. Roge and M. Mathlouthi, *Food Biophys.*, 2008, **3**, 16-24.
11. Y. Wang, X. Chuai, Y. Li, J. Guo, J. Yang, Z. Liu and S. Xu, *Crystals*, 2022, **12**.
12. G. Wang, Z. Shang, M. Liu, W. Dong, H. Li, H. Yin, J. Gong and S. Wu, *Molecules*, 2022, **27**.
13. A. Mohod, S. Bangadkar, A. Deshmukh, S. Singh, M. Bagal and P. R. Gogate, *Chem. Eng. Process.*, 2022, **178**.
14. A. Maharana and D. Sarkar, *Ind. Eng. Chem. Res.*, 2022, **61**, 11262-11275.
15. X. Gu, Z. Si, Y. Yan and X. Zhang, *Int. J. Pharm.*, 2022, **616**.
16. Y. Cao, T. Yao, G. Zhang, Z. Zhou, L. Zhai and S. Wu, *J. Mol. Liq.*, 2022, **363**.
17. C. Zhao, D. Cao, W. Zhao, S. Xu and Y. Wang, *J. Cryst. Growth*, 2021, **568**.
18. L.-D. Shiau, *J. Cryst. Growth*, 2021, **564**.
19. J. Yang, S. Xu, J. Wang and J. Gong, *J. Mol. Liq.*, 2020, **303**.
20. L. Zhang, B. Wang, J. Tang, Y. Liu, Q. Hua and L. Liu, *Int. J. Chem. React. Eng.*, 2019, **17**.
21. Y. Huang, J. Lu, H. Chen, W. Du and X. Wang, *J. Cryst. Growth*, 2019, **507**, 1-9.
22. C. Bian, H. Chen, X. Song and J. Yu, *J. Cryst. Growth*, 2019, **518**, 5-13.
23. L. Xiong, L. Zhou, X. Zhang, M. Zhang, B. Hou, Y. Bao, W. Du, W. Su, S. Zhang and Q. Yin, *J. Mol. Liq.*, 2018, **269**, 805-815.
24. L.-D. Shiau, *J. Cryst. Growth*, 2018, **496**, 18-23.
25. T. H. Mastan, M. Lenka and D. Sarkar, *Ultrason. Sonochem.*, 2017, **36**, 497-506.
26. M. Luo, C. Liu, J. Xue, P. Li and J. Yu, *J. Cryst. Growth*, 2017, **469**, 144-153.

27. X. Liu, M. Ren, J. Guo, X. Sun and P. Sun, *Optik*, 2017, **136**, 8-11.
28. S. Xu, J. Wang, K. Zhang, S. Wu, S. Liu, K. Li, B. Yu and J. Gong, *Chem. Eng. Sci.*, 2016, **155**, 248-257.
29. L. Wang, L. Zhu, L. Yang, Y. Wang, Z. Sha and X. Zhao, *J. Cryst. Growth*, 2016, **437**, 32-41.
30. L. Wang, H. Feng, Y. Dong, J. Peng and W. Li, *J. Cryst. Growth*, 2016, **454**, 105-110.
31. U. Ntuk and K. Steel, *Cryst. Res. and Technol.*, 2016, **51**, 265-275.
32. Y. Yuan, Y. Leng, C. Huang, M. Yue and Q. Tan, *Russ. J. Phys. Chem. A*, 2015, **89**, 1567-1571.
33. S. You, Y. Zhang and Y. Zhang, *J. Cryst. Growth*, 2015, **411**, 24-29.
34. H. Yang, *Crystengcomm*, 2015, **17**, 577-586.
35. K. Sangwal, E. Mielniczek-Brzoska and S. Barylska, *Chem. Eng. Res. Des.*, 2014, **92**, 491-499.
36. Y. Qian, G. Lu, Y. Sun, X. Song and J. Yu, *Cryst. Res. Technol.*, 2014, **49**, 78-83.
37. Y. Zhang and Z. Li, *Ind. Eng. Chem. Res.*, 2011, **50**, 6375-6381.
38. N. Pattanaboonmee, P. Ramasamy, R. Yimnirun and P. Manyum, *J. Cryst. Growth*, 2011, **314**, 196-201.
39. K. Sangwal, *Cryst. Growth Des.*, 2009, **9**, 942-950.
40. K. Sangwal, *Cryst. Res. Technol.*, 2009, **44**, 231-247.
41. Y. Y. Gao, C. Xie and J. K. Wang, *Mater. Res. Innov.*, 2009, **13**, 112-115.
42. O. Sahin, H. Dolas and H. Demir, *Cryst. Res. Technol.*, 2007, **42**, 766-772.
